# Supplementary material for: A Novel Canine Model of Acute Vertebral Artery Occlusion
Source: PLoS One. 2015 Nov 6;10(11):e0142251. doi: 10.1371/journal.pone.0142251 (PMC4636284; doi:10.1371/journal.pone.0142251)
Supplement: S1 Data — The age, gender, weight and color of each animal are provided, together with details of the embolic position, blocked blood vessel diameter, embolus length, and blood flow classification before and after thrombogenesis. (XLS) [file pone.0142251.s001.xls]

## Sheet: 工作表1
ID	Gender	Weight (kg)	Age (months)	Color	Embolic position	Blocked blood vessel diameter (mm)	Embolus length (mm)	Blood flow classfication before thrombogenesis	Blood flow classfication after thrombogenesis		Embolus length (mm) in male and female subgroups
1	female	20.8	12	black	left vertebroarterial artery	3.9	15.4	TIMI grade 3	TIMI grade 0			A - female	B - male
2	male	19.1	12	black+yellow	left vertebroarterial artery	4.1	16.2	TIMI grade 3	TIMI grade 0			15.4	16.2
3	female	23.1	12	yellow	left vertebroarterial artery	3.7	16.7	TIMI grade 3	TIMI grade 0			16.7	15.5
4	male	22.2	12	black	left vertebroarterial artery	3.8	15.5	TIMI grade 3	TIMI grade 0			15.6	15.4
5	female	20.7	12	yellow	left vertebroarterial artery	3.4	15.6	TIMI grade 3	TIMI grade 0			15.3	15.3
6	male	21.7	12	black	left vertebroarterial artery	4.2	15.4	TIMI grade 3	TIMI grade 0			15.3	14.7
7	male	19.5	12	black+white	left vertebroarterial artery	3.8	15.3	TIMI grade 3	TIMI grade 0			15.5	15.1
8	female	19.2	12	yellow	left vertebroarterial artery	3.8	15.3	TIMI grade 3	TIMI grade 0
9	male	20.1	12	black	left vertebroarterial artery	3.9	14.7	TIMI grade 3	TIMI grade 0		Average	15.6333	15.3667		P value:
10	female	19.7	12	black	left vertebroarterial artery	3.8	15.3	TIMI grade 3	TIMI grade 0						0.392112
11	female	21.1	12	black	left vertebroarterial artery	3.9	15.5	TIMI grade 3	TIMI grade 0		S.D.	0.535413	0.496655
12	male	23.6	12	black	left vertebroarterial artery	3.8	15.1	TIMI grade 3	TIMI grade 0
Average		20.9					15.5
S.D.		1.49909					0.511682
